# Supplementary material
Source: PubMed Central journal article supplement (PMC4110897)
Supplement: NIHMS604713-supplement-Fig_S1.pdf [file NIHMS604713-supplement-Fig_S1.pdf]

## Figure 1 SuppInfo.

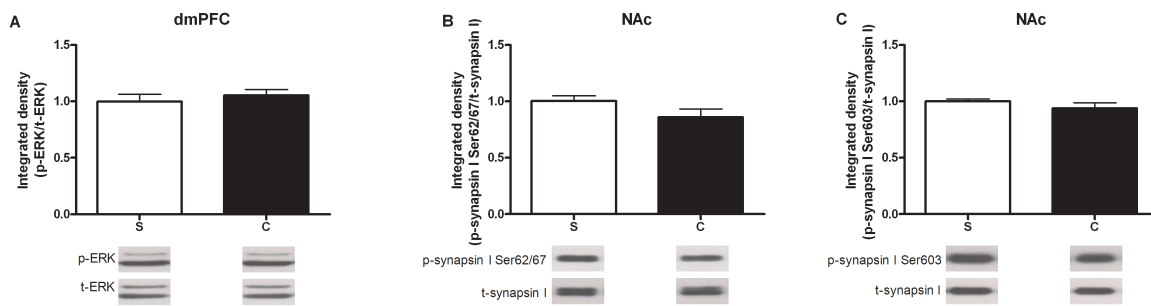

**Figure 1 SuppInfo.** No effects of abstinence on p-ERK in the dmPFC and p-synapsin I Ser62/67 and Ser603 in the NAc after cocaine self-administration. (A) p-ERK, (B) p-synapsin I Ser62/67, and (C) p-synapsin I Ser603. The bar graphs represent the mean  $\pm$  SEM. S=Saline; C=Cocaine.
